# Supplementary material for: Drug resistance markers within an evolving efficacy of anti-malarial drugs in Cameroon: a systematic review and meta-analysis protocol
Source: Research Square preprint supplement (doi:10.21203/rs.3.rs-26096/v4), 2020-12-04
Supplement: Supplementary file 1 [file 0decc8d26f2d7a184243d07a.xlsx]

## Sheet: Sheet1
Additional file 4-Piloted data extraction form on anti-malarial drug resistance gene mutations in Cameroon
Study ID	Authors	Year of study	Year of publication	Site of isolation	Sample size	Age group in months/years	Study design	Genotyping method	Sequence genotyping success rate (%)	Anti-malarial drug resistance gene	Amino acid mutations	Number of samples genotyped	Number of samples with mutations	Prevalence of molecular marker (%)
